# Supplementary material for: Notch Inhibition Prevents Differentiation of Human Limbal Stem/Progenitor Cells in vitro
Source: PubMed Central journal article supplement (PMC6637172; doi:10.1038/s41598-019-46793-6), 2019-07-17
Supplement: 41598_2019_46793_MOESM1_ESM.pdf [file 41598_2019_46793_MOESM1_ESM.pdf]

# Notch Inhibition Prevents Differentiation of Human Limbal Stem/Progenitor Cells *in vitro*

Sheyla González<sup>1</sup>, Heui Uhm<sup>2</sup> and Sophie X. Deng<sup>1\*</sup>

<sup>1</sup>Cornea Division, Stein Eye Institute, University of California, Los Angeles, CA 90095, USA.

<sup>2</sup>David Geffen School of Medicine, University of California, Los Angeles, CA 90095, USA.

**\*Corresponding author:**

Sophie X. Deng, M.D., Ph.D.

Professor of Ophthalmology

Stein Eye Institute, University of California, Los Angeles

100 Stein Plaza

Los Angeles, CA 90095

Tel: 310-206-7202

Fax: 310-794-7906

E-mail: [deng@jsei.ucla.edu](mailto:deng@jsei.ucla.edu)

## Supplementary Tables

**Supplementary Table S1.** Primary antibodies used for immunocytochemistry, immunohistochemistry and western blot.

| Primary Antibody | Dilution | Source and Catalogue #            |
|------------------|----------|-----------------------------------|
| K12              | 1:100    | Santa Cruz Biotechnology sc-25722 |
| K14              | 1:50     | Fisher Scientific MS-115-R7       |
| p63 $\alpha$     | 1:100    | Cell Signaling Technology #4892   |
| Notch1           | 1:100    | R&D Systems AF3647                |
| Cleaved Notch1   | 1:100    | Cell Signaling Technology #4147   |
| GAPDH            | 1:100    | EMD Millipore MAB374              |
| HES1             | 1:100    | Abcam ab71559                     |
| HEY1             | 1:100    | Abcam ab22614                     |
| Ki67             | 1:100    | DAKO M7240                        |

Abbreviations: GAPDH, glyceraldehyde-3-phosphate dehydrogenase; HES1, hairy and enhancer of split-1; HEY1, hairy/enhancer-of-split related with YRPW motif protein 1; K12, cytokeratin 12; K14, cytokeratin 14.

**Supplementary Table S2.** Primers used for qRT-PCR.

| Gene          | Direction | Primer Sequence (5'→3') | GeneBank Accession number |
|---------------|-----------|-------------------------|---------------------------|
| GAPDH         | Forward   | CGACCACTTTGTCAAGCTCA    | NG_007073.2               |
|               | Reverse   | AGGGGTCTACATGGCAACTG    |                           |
| ABCG2         | Forward   | CCGCGACAGCTTCCAATGACCT  | NG_032067.2               |
|               | Reverse   | GCCGAAGAGCTGCTGAGAAGTGT |                           |
| $\Delta$ Np63 | Forward   | TCCATGGATGATCTGGCAAGT   | NG_007550.1               |
|               | Reverse   | GCCCTTCCAGATCGCATGT     |                           |
| N-cadherin    | Forward   | GAGGAGTCAGTGAAGGAGTCA   | NG_011959.1               |
|               | Reverse   | GGCAAGTTGATTGGAGGGATG   |                           |
| K14           | Forward   | GACCATTGAGGACCTGAGGA    | NG_008624.1               |
|               | Reverse   | ATTGATGTCGGCTTCCACAC    |                           |
| K12           | Forward   | CCAGGTGAGGTCAGCGTAGAA   | NG_008077.1               |
|               | Reverse   | CCTCCAGGTTGCTGATGAGC    |                           |
| Ki67          | Forward   | CTTGGGTGC GACTTGACG     | NC_000010.11              |
|               | Reverse   | GTCGACCCCGCTCCTTTT      |                           |
| Snail1        | Forward   | CAGCTATTT CAGCCTCCTGTT  | NC_000020.11              |
|               | Reverse   | CCGACAAGTGACAGCCATTA    |                           |
| Twist         | Forward   | TCACACCTCTGCATTCTGATAG  | NG_008114.1               |
|               | Reverse   | CTGATTGGCAGCAGCTCTT     |                           |
| Vimentin      | Forward   | CAGCTTTCAAGTGCCTTTCTG   | NG_012413.1               |
|               | Reverse   | CTTG TAGGAGTGTCGGTTGTT  |                           |

Abbreviations: ABCG2, ATP-binding cassette sub-family G member 2; GAPDH, glyceraldehyde-3-phosphate dehydrogenase; K12, cytokeratin 12; K14, cytokeratin 14.

## Supplementary Figures

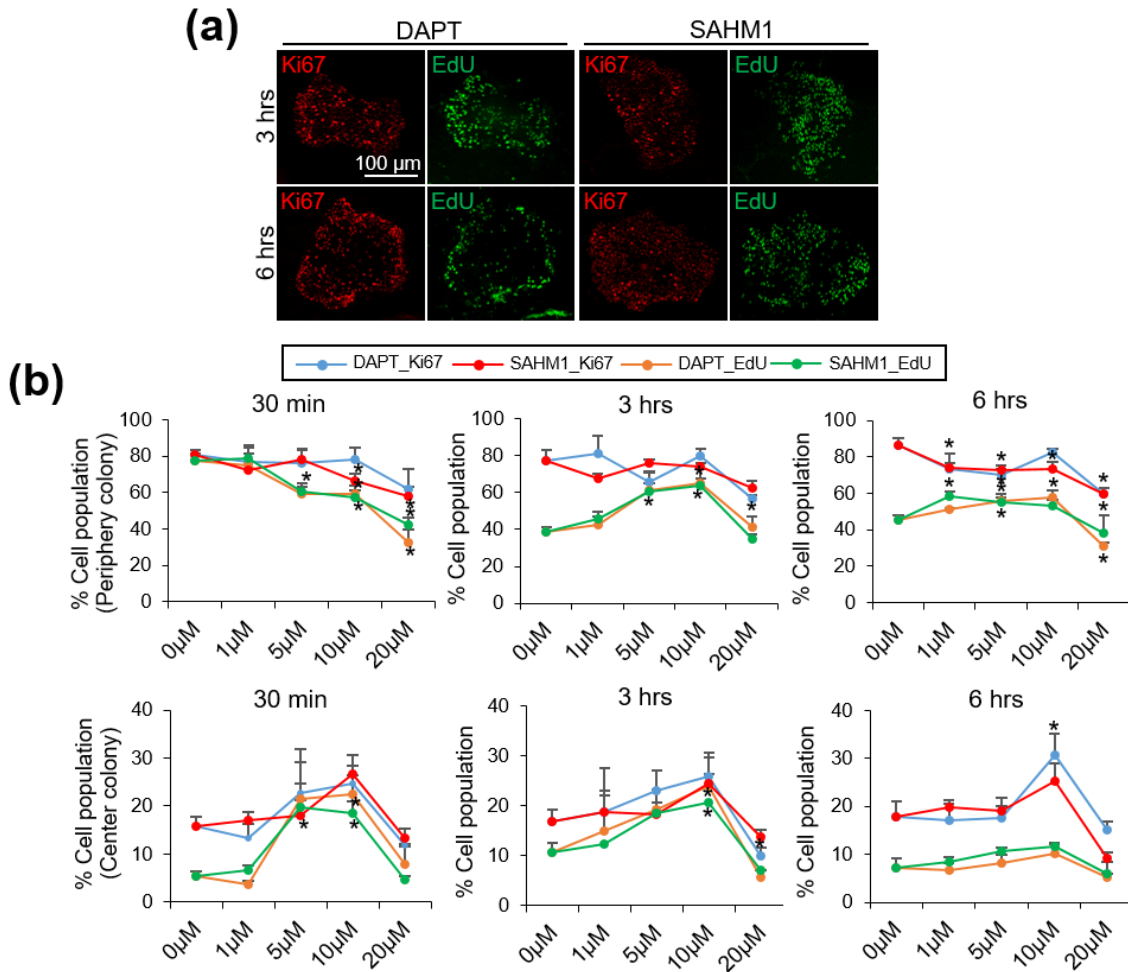

**Supplementary Fig. S1.** Ki67 and EdU expression and localization in the LSC colonies after a 30-minute, 3- and 6-hours incubation with DAPT/SAHM1. **(a)** Representative images of EdU and Ki67 in the LSC colonies. **(b)** Quantification of the Ki67<sup>+</sup> and EdU<sup>+</sup> cell population in the center and periphery of the colony after a 30-minute, 3-hours and 6-hours incubation with DAPT/SAHM1 at different concentrations.

Data are represented as mean  $\pm$  SEM.

Abbreviations: LSC, limbal stem/progenitor cells.

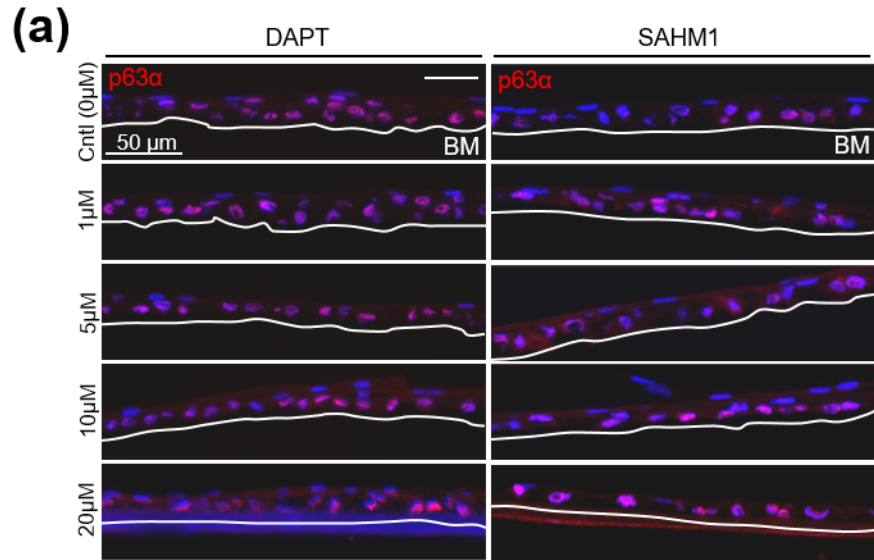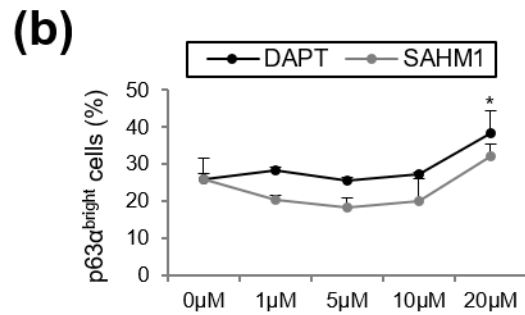

**Supplementary Fig. S2.** Quantification of p63 $\alpha^{\text{bright}}$  cells at the basal layer of the LSC cultures with DAPT/SAHM1 at different concentrations. **(a)** Representative pictures of p63 $\alpha$  on cross-sections of LSC cultures. **(b)** Quantification of p63 $\alpha^{\text{bright}}$  cells at the basal layer.

Data are represented as mean  $\pm$  SEM.

Abbreviations: BM, basement membrane; Cntl, control; LSC, limbal stem/progenitor cells.

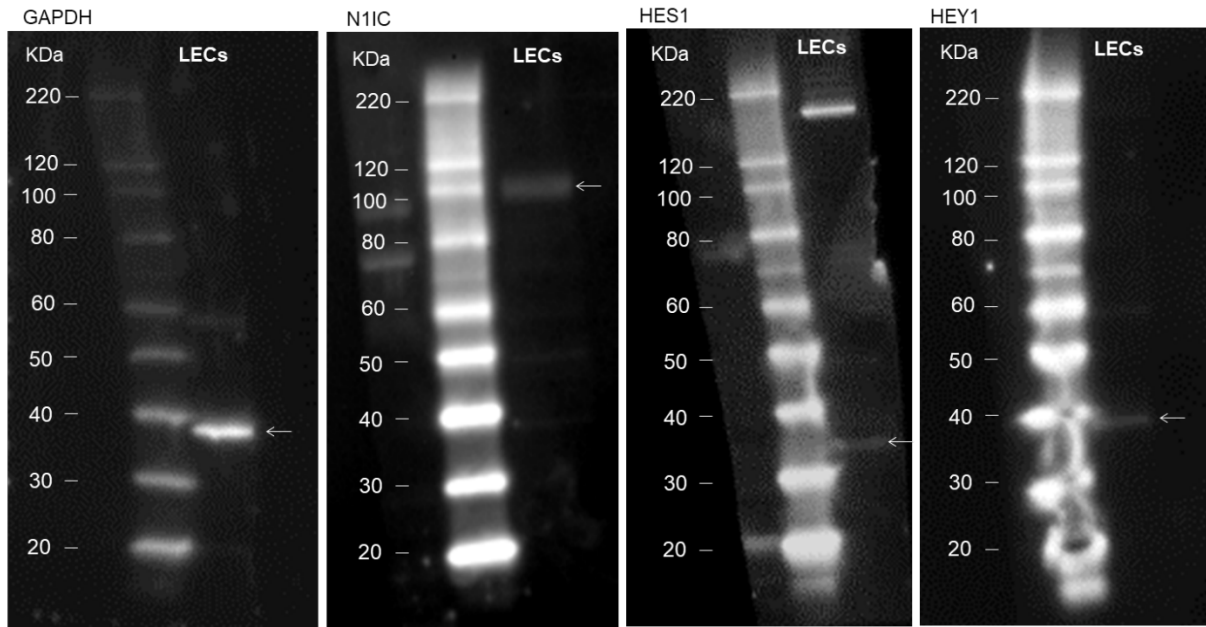

**Supplementary Fig. S3.** Uncropped images of blots shown in Figure 1 for GAPDH, N1IC, HES1 and HEY1.

Abbreviations: GAPDH, Glyceraldehyde-3-Phosphate Dehydrogenase; HES1, hairy and enhancer of split-1; HEY1, hairy/enhancer-of-split related with YRPW motif protein 1; N1IC, Notch1 intracellular domain.
